# Supplementary material
Source: publisher site journal article supplement (https://www.spandidos-publications.com/4316/downloadSupplementary)

Figure S1. Flow cytometry plots showing apoptotic cells induced by (A) *circ\_0000523* and (B) *miR-let-7b*. (C) Flow cytometry plots revealing that the increase in apoptosis of HCT116 cells following *miR-let-7b* mimic transfection was reversed by *circ\_0000523*. inhibitor, inhibitor-treated group; inhibitor NC, the control of inhibitor-treated group (PBS-treated group); mimics, *miR-let-7b* overexpression group; mimics NC, the control of mimics group; circ-OE, HCT116 cells with overexpression of *hsa\_circ\_0000523*; circ-EV, HCT116 cells transfected with empty vector.

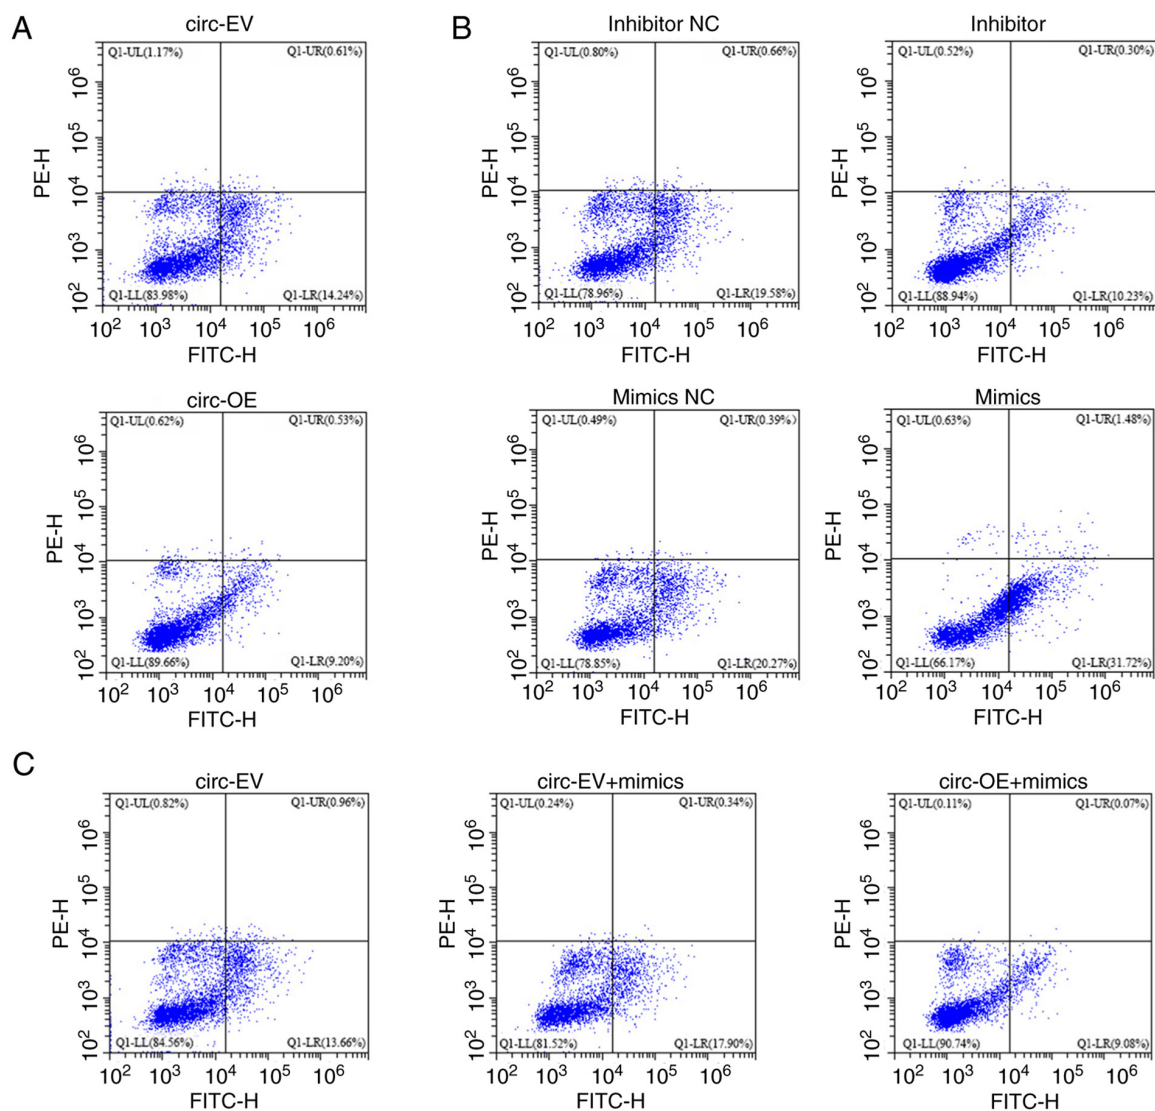

Supplement: Supplementary file 1 [file downloadSupplementary]
